# Supplementary material for: Minor gait impairment despite white matter damage in pure small vessel disease
Source: PubMed Central journal article supplement (PMC6801180; doi:10.1002/acn3.50891), 2019-09-16
Supplement: ACN3-6-2026-s001.pdf [file ACN3-6-2026-s001.pdf]

**Supplementary Table 1. Linear regressions with global white matter alterations (PSMD)****in the single task**

| <b>Regressor<br/>Single task</b> | <b><math>\beta</math></b> | <b><math>P_{\text{uncorr.}}</math></b> | <b><math>P_{\text{corr.}}</math></b> | <b><math>R^2_{\text{adj.}}</math><br/>[%]</b> |
|----------------------------------|---------------------------|----------------------------------------|--------------------------------------|-----------------------------------------------|
| <b>Pace</b>                      |                           |                                        |                                      |                                               |
| Vel                              | -0.176                    | 0.01                                   | 0.09                                 | 13.7                                          |
| Cad                              | -0.148                    | 0.08                                   | 0.65                                 | 5.5                                           |
| SLen                             | -0.207                    | 0.00                                   | 0.03*                                | 18.0                                          |
| <b>Rhythm</b>                    |                           |                                        |                                      |                                               |
| DSupp                            | -0.185                    | 0.08                                   | 0.62                                 | 5.7                                           |
| Swing                            | -0.190                    | 0.33                                   | 1.00                                 | 0.0                                           |
| <b>Variability</b>               |                           |                                        |                                      |                                               |
| STime CV                         | -0.273                    | 0.03                                   | 0.24                                 | 9.7                                           |
| SLen CV                          | -0.192                    | 0.04                                   | 0.22                                 | 8.5                                           |
| BoS CV                           | -0.027                    | 0.84                                   | 1.00                                 | 0.0                                           |

\* $P_{\text{corr.}} < 0.05$ ; Linear regressions corrected for leg length.

BoS CV, base of support variability; Cad, cadence; DSupp, double support; SLen, stride length; SLen CV, stride length variability; STime CV, stride time variability; Swing, swing phase; Vel, velocity.
